# Supplementary material for: Biodegradable Micelles for NIR/GSH-Triggered Chemophototherapy of Cancer
Source: MDPI journal article supplement (doi:10.3390/nano9010091), 2019-01-11
Supplement: s1 [file s1]

## Supplementary Materials

### Biodegradable Micelles for NIR/GSH-Triggered Chemophototherapy of Cancer

**Table S1.** Elemental analysis and gel permeation chromatography (GPC) of PCL-SS-BPLP and biotin-PEG-cypate.

|                   | Elemental analysis |       |      |      | GPC            |                |      |
|-------------------|--------------------|-------|------|------|----------------|----------------|------|
|                   | C                  | H     | N    | S    | M <sub>n</sub> | M <sub>w</sub> | PDI  |
| PCL-SS-BPLP       | 2.5%               | 54.9% | 6.9% | 5.6% | 9135           | 13428          | 1.47 |
| Biotin-PEG-cypate | 4.8%               | 54.8% | 7.7% | 0.9% | 2576           | 3307           | 1.28 |

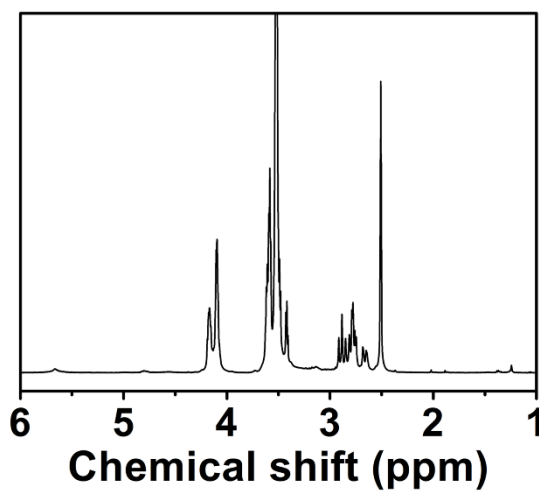

**Figure S1.** <sup>1</sup>H NMR spectrum of BPLP in D<sub>2</sub>O.

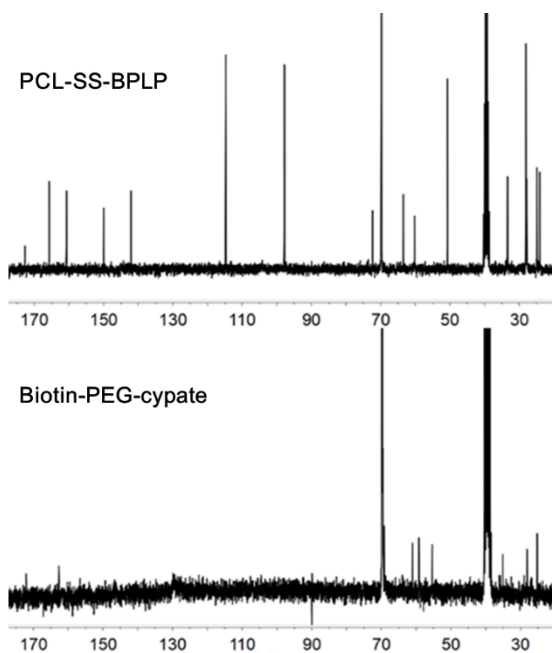

**Figure S2.** <sup>13</sup>C NMR spectrum of PCL-SS-BPLP and biotin-PEG-cypate in DMSO-d<sub>6</sub>.

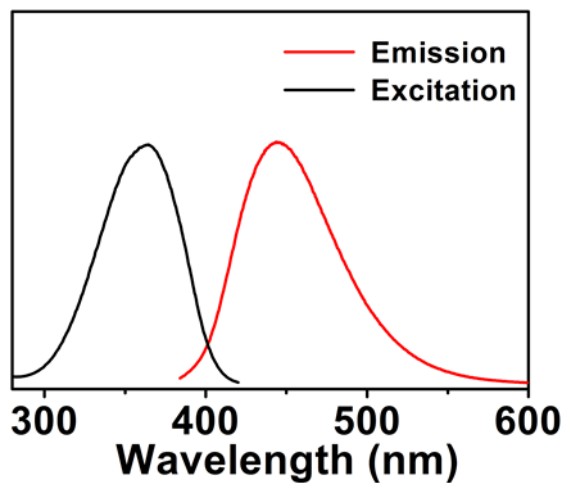

Figure S3. Emission and excitation spectra of PCL-SS-BPLP.

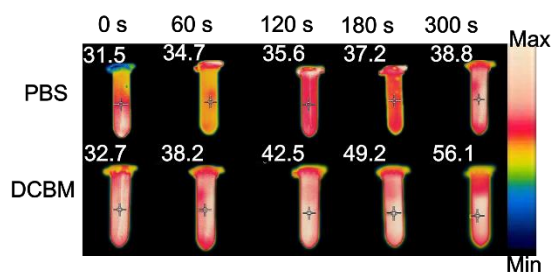

Figure S4. The surface photothermal performance of DCBMs.

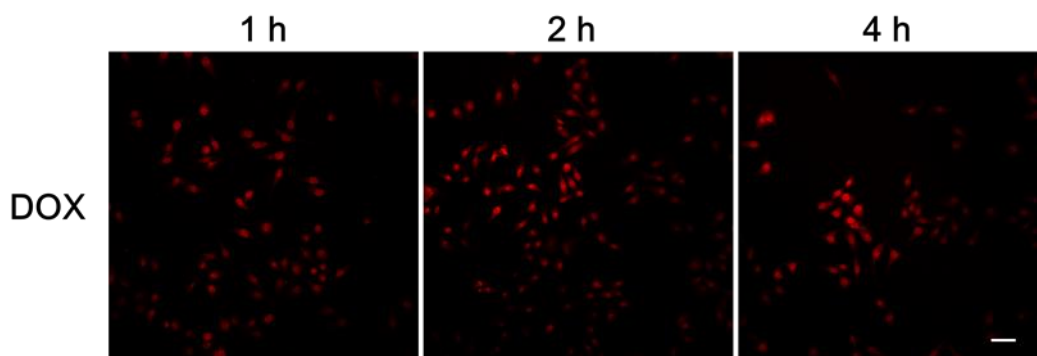

Figure S5. Confocal image of HepG2. The red fluorescence is from DOX. Scale bars = 50  $\mu\text{m}$ .

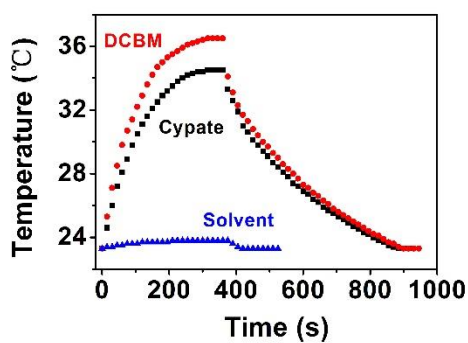

Figure S6. Photothermal heating and cooling curves of the DCBMs, free cypate, and solvent (water/ethanol = 9:1) under NIR laser irradiation, followed by switching off the laser.
